# Supplementary material
Source: PubMed Central journal article supplement (PMC4072417)
Supplement: nn405839n_si_001.pdf [file nn405839n_si_001.pdf]

# Hyaluronan Polymer Length, Grafting Density and Surface PEG Coating Influence *in vivo* Circulation and Tumor Targeting of Hyaluronan-Grafted Liposomes

Hussaini Syed Sha Qhattal, Tanvirul Hye, Amer Alali, and Xinli Liu\*

Department of Pharmaceutical Sciences, School of Pharmacy, Texas Tech University

Health Sciences Center, Amarillo, TX, 79106, USA

## Supporting Information

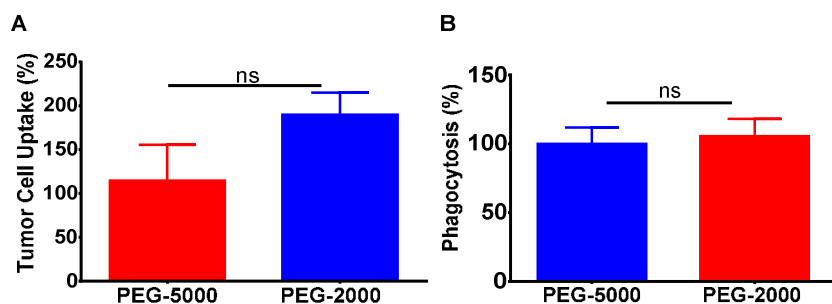

**Supporting Figure S1.** Quantitative analysis of *in vitro* tumor cell uptake and macrophage phagocytosis of DiD-labeled PEG-5000 and PEG-2000 liposomes. (A) Cellular uptake of liposomes in CD44-overexpressing MDA-MB-231 cells. (B) Phagocytosis of liposomes in THP-1 macrophages. The uptake of liposomes was measured by flow cytometry, and the mean fluorescence was expressed as a percentage of the PEG-5000 liposomes (100%), ns = not significant.
